# Supplementary material for: Comparison of video and in-hospital consultations during early in-home care for premature infants and their families: A randomised trial
Source: PubMed Central journal article supplement — J Telemed Telecare. 2020 Mar 30;28(1):24–36. doi: 10.1177/1357633X20913411 (PMC8721551; doi:10.1177/1357633x20913411), 2020-03-30
Supplement: JTT913411_Supplemental_Material.pdf [file JTT913411_Supplemental_Material.pdf]

## **Supplementary material**

### **Appendix 1**

Criteria for early in-home care

- infant was born premature,
- infant had a GA  $\geq 34+0$  at the start of in-home care,
- infant did not have apnea,
- infant maintained a normal body temperature,
- infant gained weight and received tube feeding,
- infant started breast feeding/bottle nutrition,
- infant did not need medical treatment
- family did not require observations of parenting skills.
